# Supplementary material
Source: PubMed Central journal article supplement (PMC8421097)
Supplement: mmc2.pdf [file mmc2.pdf]

**Table S2.** Changes in mutation frequencies at signature and/or convergent mutation sites within 501Y lineage viruses between 15 March and 01 June 2021 that are detectably evolving under positive selection in individual lineages and/or in the global SARS-CoV-2 dataset. *Related to Figure 4.*

| ORF(Gene)                  | Inter-lineage convergence detected in April and <b>June</b> | Fold-increase in lineage V1 | Fold-increase in lineage V2 | Fold-increase in lineage V3 |
|----------------------------|-------------------------------------------------------------|-----------------------------|-----------------------------|-----------------------------|
| ORF1a/265I(nsp2/85I)       | V1,V2                                                       | 2.2                         | Fixed                       |                             |
| ORF1a/681F(nsp2/501F)      | V1,V2,V3                                                    | 1.6                         | 3.0                         | <0.1                        |
| ORF1a/1001I(nsp3/183I)     | <b>V1,V2</b>                                                | Fixed                       | 2.2                         |                             |
| ORF1a/1188L(nsp3/370L)     | V1,V3                                                       | 2.5                         |                             | Fixed                       |
| ORF1a/1655N(nsp3/837N)     | <b>V1,V2,V3</b>                                             | 2.5                         | Fixed                       | 6.6                         |
| ORF1a/1708D(nsp3/890D)     | <b>V1,V2,V3</b>                                             | Fixed                       | 15.8                        | >12.0                       |
| ORF1a/3829F(nsp6/260F)     | V1,V2,V3                                                    | 2.2                         | 0.5                         | 1.4                         |
| ORF1b/970L(Helicase/47L)   | V1,V2,V3                                                    | 1.7                         | 0.2                         | <0.1                        |
| ORF1b/970S(Helicase/47S)   |                                                             | 2.2                         |                             |                             |
| ORF1b/1522I(Helicase/599I) | V1, <b>V2</b> ,V3                                           | 1.9                         | 12.7                        | 4.8                         |
| ORF1b/2020Y(Exonuc/496Y)   | V1, <b>V2</b> ,V3                                           | 0.7                         | 2.2                         | <0.1                        |
| S/26S                      | V1, <b>V2</b> ,V3                                           | 0.8                         | >13.0                       | Fixed                       |
| S/26L                      |                                                             |                             | 11.1                        |                             |
| S/98F                      | V1,V2, <b>V3</b>                                            | 2.5                         | 5.3                         | >6.0                        |
| S/138Y                     | V1,V2,V3                                                    | 2.1                         | 0.8                         | Fixed                       |
| S/215G                     | V1,V2                                                       | <0.1                        | Fixed                       |                             |
| S/215Y                     |                                                             | 2.1                         |                             |                             |
| S/215C                     |                                                             |                             | >6.4                        |                             |
| S/484K                     | V1,V2,V3                                                    | 3.7                         | Fixed                       | Fixed                       |
| S/655Y                     | V1,V2,V3                                                    | 2.3                         | 0.2                         | Fixed                       |
| S/681H                     | V1,V2,V3                                                    | Fixed                       | 0.6                         | 21.0                        |
| S/681R                     |                                                             | 2.2                         |                             |                             |
| S/701V                     | V1,V2                                                       | 2.4                         | Fixed                       |                             |
| S/701S                     |                                                             | 3.1                         |                             |                             |
| S/716I                     | V1,V2, <b>V3</b>                                            | Fixed                       | 3.7                         | >13.5                       |
| S/1027I                    | V2,V3                                                       |                             | >44.0                       | Fixed                       |

|            |                  |       |       |       |
|------------|------------------|-------|-------|-------|
| S/1118H    | <b>V1,V2,V3</b>  | Fixed | 4.0   | >21.0 |
| S/1176F    | <b>V2,V3</b>     |       | 19.5  | Fixed |
| S/1264L    | V1,V2, <b>V3</b> | 2.3   | 0.4   | 1.4   |
| ORF3a/57H  | V1,V2, <b>V3</b> | 1.4   | Fixed | 2.8   |
| ORF3a/171L | V1,V2, <b>V3</b> | 0.9   | Fixed | 11.9  |
| E/71L      | <b>V1,V2</b>     | 1.1   | Fixed |       |
| E/71T      |                  | 5.8   |       |       |
| E/71R      |                  | >10   |       |       |
| N/205I     | V1,V2, <b>V3</b> | 0.8   | Fixed | 1.2   |
| N/205-     | <b>V1,V3</b>     | 1.4   |       | 3.0   |
| N/235F     | V1,V2, <b>V3</b> | Fixed | 2.3   | >10.0 |
| N/235L     |                  | 2.9   |       |       |

---
