# Supplementary material
Source: PubMed Central journal article supplement (PMC8421097)
Supplement: mmc3.pdf [file mmc3.pdf]

**Table S3.** Mutations comprising the 501Y lineage meta-signature. Related to Figure 4 and Figure 5

| Mutation (gene segment coordinate) | Positive selection<br>G=Global<br>(in lineage VX) | Inter-lineage convergence | Maximum fold increase between March and June 2021 (lineage) |
|------------------------------------|---------------------------------------------------|---------------------------|-------------------------------------------------------------|
| ORF1a/265I(nsp2/85I)               | G                                                 | V1,V2                     | 2.2 (V1)                                                    |
| ORF1a/681F(nsp2/501F)              | G (V3)                                            | V1,V2,V3                  | 3.0 (V2)                                                    |
| ORF1a/1001I(nsp3/183I)             | G (V1)                                            | V1,V2                     | 2.2 (V2)                                                    |
| ORF1a/1188L(nsp3/370L)             | G (V3)                                            | V1,V3                     | 2.5 (V1)                                                    |
| ORF1a/1655N(nsp3/837N)             | G                                                 | V1,V2,V3                  | 6.6 (V3)                                                    |
| ORF1a/1708D(nsp3/890D)             | G                                                 | V1,V2,V3                  | 15.8 (V2)                                                   |
| ORF1a/3676-(nsp6/107-)             | G                                                 | V1,V2,V3                  | --                                                          |
| ORF1a/3829F(nsp6/260F)             | G (V1)                                            | V1,V2,V3                  | 2.2 (V1)                                                    |
| ORF1b/970LS(Helicase/47LS)         | (V3)                                              | V1,V2,V3                  | 2.2 (V1)                                                    |
| ORF1b/1522I(Helicase/599I)         | G (V3)                                            | V1,V2,V3                  | 12.7(V2)                                                    |
| ORF1b/2020Y(Exonuc/496Y)           | (V3)                                              | V1,V2,V3                  | 2.2 (V2)                                                    |
| S/18F                              | G(V3)                                             | V1,V2,V3                  | 1.1 (V2)                                                    |
| S/26LRS                            | G (V3)                                            | V1,V2,V3                  | >13.0 (V2)                                                  |
| S/69-                              | G                                                 | V1,V2,V3                  | 1.7 (V2)                                                    |
| S/98F                              | G (V1)                                            | V1,V2,V3                  | >6.0 (V3)                                                   |
| S/138HY                            | G (V3)                                            | V1,V2,V3                  | 2.1 (V1)                                                    |
| S/144-                             | G                                                 | V1,V2,V3                  | 2.3 (V2)                                                    |
| S/215GHVY                          | G (V2)                                            | V1,V2                     | 2.1 (V1)                                                    |
| S/243-                             | G                                                 | V1,V2,V3                  | <0.1 (V1,V3)                                                |
| S/417NT                            | G (V2,V3)                                         | V2,V3                     | <0.1 (V1)                                                   |
| S/484K                             | G                                                 | V1,V2,V3                  | 3.7 (V1)                                                    |
| S/501Y                             | G (V1,V2,V3)                                      | V1,V2,V3                  | --                                                          |
| S/655Y                             | G (V3)                                            | V1,V2,V3                  | 2.3 (V1)                                                    |
| S/681LRH                           | G (V1)                                            | V1,V2,V3                  | 21.0 (V3)                                                   |
| S/701V                             | G                                                 | V1,V2                     | 2.4 (V1)                                                    |
| S/716I                             | G                                                 | V1,V2,V3                  | >13.5 (V3)                                                  |
| S/1027I                            | G (V3)                                            | V2,V3                     | >44.0 (V2)                                                  |
| S/1118H                            | G                                                 | V1,V2,V3                  | >21.0 (V3)                                                  |

|             |        |          |            |
|-------------|--------|----------|------------|
| S/1176F     | G      | V2,V3    | 19.5 (V2)  |
| S/1264L     | (V1)   | V1,V2,V3 | 2.3 (V1)   |
| ORF3a/57HLY | G      | V1,V2,V3 | 2.8 (V3)   |
| ORF3a/171L  | G      | V1,V2,V3 | 11.9 (V3)  |
| E/71LRT     |        | V1,V2    | >10.0 (V1) |
| N/205I-     | G      | V1,V2,V3 | 3.0 (V1)   |
| N/235FL     | G (V1) | V1,V2,V3 | >10.0 (V3) |

---
